# Supplementary material
Source: publisher figshare collection journal article supplement (https://tandf.figshare.com/articles/dataset/_/5572963)
Supplement: Supplementary file 1 [file Supplementay Materials (Tables).pdf › Supplementay Materials (Tables).pdf]

**Table A1: Phases of Chinese immigration to Vietnam**

| <b>Period</b>                                                                                         | <b>Chinese immigrants</b>                                                                                                                                                                                                                                                   | <b>Economic role</b>                                                                                                                                                                                                                                                                                         |
|-------------------------------------------------------------------------------------------------------|-----------------------------------------------------------------------------------------------------------------------------------------------------------------------------------------------------------------------------------------------------------------------------|--------------------------------------------------------------------------------------------------------------------------------------------------------------------------------------------------------------------------------------------------------------------------------------------------------------|
| Before the first half of the 17 <sup>th</sup> century                                                 | <ul style="list-style-type: none"><li>-Seasonal traders or political refugees</li><li>-Clustered in some trading hubs in Vietnam (e.g. Hoi An)</li><li>-Slow and stable inflow</li></ul>                                                                                    | <ul style="list-style-type: none"><li>-Were mostly seasonal traders who did not settle down in any one place for a long time</li><li>-Had no perpetual role in the Vietnamese economy</li></ul>                                                                                                              |
| Second half of the 17 <sup>th</sup> century – second half of the 19 <sup>th</sup> century             | <ul style="list-style-type: none"><li>-Traders, miners and workers</li><li>-Settled down mostly in South Vietnam.</li><li>-Increased in the volume of inflow due to the increase in trade opportunities brought about by the influx of Western traders to Vietnam</li></ul> | <ul style="list-style-type: none"><li>-Helped with establishment of villages and towns, fostering the circulation of goods and people for the Vietnamese domestic market</li><li>-Dominated internal and external trades</li><li>-Became a permanent component of the Vietnamese population</li></ul>        |
| Second half of the 19 <sup>th</sup> century – 1955 (French colonization of Vietnam, Chinese diaspora) | <ul style="list-style-type: none"><li>-Traders, workers and middlemen</li><li>-Settled down mostly in South Vietnam</li><li>-Increased in volume due to favorable treatment from the French and high demand of the French administration for skilled labors.</li></ul>      | <ul style="list-style-type: none"><li>-Dominated trade</li><li>-Expanded external trade thanks to the global Chinese network created by the earlier Chinese diaspora.</li><li>-Economic roles extended to ownership and administration of plantations, finance, transportation, and manufacturing.</li></ul> |
| 1955-1975                                                                                             | <ul style="list-style-type: none"><li>-Traders, high-skilled labors</li><li>-Stable inflow</li></ul>                                                                                                                                                                        | <ul style="list-style-type: none"><li>-Dominated trade, manufacturing, finance, and transportation</li><li>-Gained influence in technical and managerial professions</li></ul>                                                                                                                               |
| 1975-1986                                                                                             | <ul style="list-style-type: none"><li>-Exodus</li></ul>                                                                                                                                                                                                                     | <ul style="list-style-type: none"><li>-Lost status and economic dominance due to the Vietnamese Communist Party's post-war policies.</li></ul>                                                                                                                                                               |
| 1986-present                                                                                          | <ul style="list-style-type: none"><li>-Slow and stable outflow</li></ul>                                                                                                                                                                                                    | <ul style="list-style-type: none"><li>-Allowed to do business again</li><li>-Played a crucial role in the development of the country</li></ul>                                                                                                                                                               |

Source: Tran (1993)

**Table A2: Merged Provinces in Final Data**

| Merged Province         | Province in 1979 | Province in 1989 | Province in 1999 | Province in 2009 |
|-------------------------|------------------|------------------|------------------|------------------|
| <b>Hanoi</b>            | Hanoi            | Hanoi            | Hanoi            | Hanoi            |
|                         | Ha Son Binh      | Ha Son Binh      | Hoa Binh         | Hoa Binh         |
|                         |                  |                  | Ha Tay           |                  |
| <b>Ho Chi Minh City</b> | Ho Chi Minh City |
| <b>Hai Phong</b>        | Hai Phong        | Hai Phong        | Hai Phong        | Hai Phong        |
| <b>Cao Bang</b>         | Cao Bang         | Cao Bang         | Cao Bang         | Cao Bang         |
|                         | Bac Thai         | Bac Thai         | Bac Kan          | Bac Kan          |
|                         |                  |                  | Thai Nguyen      | Thai Nguyen      |
| <b>Ha Tuyen</b>         | Ha Tuyen         | Ha Tuyen         | Ha Giang         | Ha Giang         |
|                         |                  |                  | Tuyen Quang      | Tuyen Quang      |
| <b>Lang Son</b>         | Lang Son         | Lang Son         | Lang Son         | Lang Son         |
| <b>Lai Chau</b>         | Lai Chau         | Lai Chau         | Lai Chau         | Lai Chau         |
|                         |                  |                  |                  | Dien Bien        |
| <b>Hoang Lien Son</b>   | Hoang Lien Son   | Hoang Lien Son   | Lao Cai          | Lao Cai          |

|                    |             |             |            |            |
|--------------------|-------------|-------------|------------|------------|
|                    |             |             | Yen Bai    | Yen Bai    |
|                    |             |             |            |            |
| <b>Son La</b>      | Son La      | Son La      | Son La     | Son La     |
|                    |             |             |            |            |
| <b>Vinh Phu</b>    | Vinh Phu    | Vinh Phu    | Vinh Phuc  | Vinh Phuc  |
|                    |             |             | Phu Tho    | Phu Tho    |
|                    |             |             |            |            |
| <b>Ha Bac</b>      | Ha Bac      | Ha Bac      | Bac Ninh   | Bac Ninh   |
|                    |             |             | Bac Giang  | Bac Giang  |
|                    |             |             |            |            |
| <b>Quang Ninh</b>  | Quang Ninh  | Quang Ninh  | Quang Ninh | Quang Ninh |
|                    |             |             |            |            |
| <b>Hai Hung</b>    | Hai Hung    | Hai Hung    | Hai Duong  | Hai Duong  |
|                    |             |             | Hung Yen   | Hung Yen   |
|                    |             |             |            |            |
| <b>Thai Binh</b>   | Thai Binh   | Thai Binh   | Thai Binh  | Thai Binh  |
|                    |             |             |            |            |
| <b>Ha Nam Ninh</b> | Ha Nam Ninh | Ha Nam Ninh | Ha Nam     | Ha Nam     |
|                    |             |             | Nam Dinh   | Nam Dinh   |
|                    |             |             | Ninh Binh  | Ninh Binh  |
|                    |             |             |            |            |
| <b>Thanh Hoa</b>   | Thanh Hoa   | Thanh Hoa   | Thanh Hoa  | Thanh Hoa  |
|                    |             |             |            |            |
| <b>Nghe Tinh</b>   | Nghe Tinh   | Nghe Tinh   | Nghe An    | Nghe An    |
|                    |             |             | Ha Tinh    | Ha Tinh    |

|                          |                   |                   |                  |                  |
|--------------------------|-------------------|-------------------|------------------|------------------|
| <b>Binh Tri Thien</b>    | Binh Tri Thien    | Quang Binh        | Quang Binh       | Quang Binh       |
|                          |                   | Quang Tri         | Quang Tri        | Quang Tri        |
|                          |                   | Thua Thien - Hue  | Thua Thien - Hue | Thua Thien - Hue |
| <b>Quang Nam-Da Nang</b> | Quang Nam-Da Nang | Quang Nam-Da Nang | Da Nang          | Da Nang          |
|                          |                   |                   | Quang Nam        | Quang Nam        |
| <b>Nghia Binh</b>        | Nghia Binh        | Quang Ngai        | Quang Ngai       | Quang Ngai       |
|                          |                   | Binh Dinh         | Binh Dinh        | Binh Dinh        |
| <b>Phu Khanh</b>         | Phu Khanh         | Phu Yen           | Phu Yen          | Phu Yen          |
|                          |                   | Khanh Hoa         | Khanh Hoa        | Khanh Hoa        |
| <b>Thuan Hai</b>         | Thuan Hai         | Thuan Hai         | Ninh Thuan       | Ninh Thuan       |
|                          |                   |                   | Binh Thuan       | Binh Thuan       |
| <b>Gia Lai - Kom Tum</b> | Gia Lai - Kom Tum | Gia Lai - Kom Tum | Gia Lai          | Gia Lai          |
|                          |                   |                   | Kon Tum          | Kon Tum          |
| <b>Dak Lak</b>           | Dak Lak           | Dak Lak           | Dak Lak          | Dak Lak          |
|                          |                   |                   |                  | Dak Nong         |

|                   |            |            |            |            |
|-------------------|------------|------------|------------|------------|
| <b>Lam Dong</b>   | Lam Dong   | Lam Dong   | Lam Dong   | Lam Dong   |
| <b>Song Be</b>    | Song Be    | Song Be    | Binh Duong | Binh Duong |
|                   |            |            | Binh Phuoc | Binh Phuoc |
| <b>Tay Ninh</b>   | Tay Ninh   | Tay Ninh   | Tay Ninh   | Tay Ninh   |
| <b>Long An</b>    | Long An    | Long An    | Long An    | Long An    |
| <b>Dong Thap</b>  | Dong Thap  | Dong Thap  | Dong Thap  | Dong Thap  |
| <b>An Giang</b>   | An Giang   | An Giang   | An Giang   | An Giang   |
| <b>Tien Giang</b> | Tien Giang | Tien Giang | Tien Giang | Tien Giang |
| <b>Ben Tre</b>    | Ben Tre    | Ben Tre    | Ben Tre    | Ben Tre    |
| <b>Cuu Long</b>   | Cuu Long   | Cuu Long   | Vinh Long  | Vinh Long  |
|                   |            |            | Tra Vinh   | Tra Vinh   |
| <b>Hau Giang</b>  | Hau Giang  | Hau Giang  | Soc Trang  | Soc Trang  |
|                   |            |            | Can Tho    | Can Tho    |
|                   |            |            |            | Hau Giang  |
| <b>Kien Giang</b> | Kien Giang | Kien Giang | Kien Giang | Kien Giang |

|                 |                 |                 |                    |                    |
|-----------------|-----------------|-----------------|--------------------|--------------------|
| <b>Minh Hai</b> | Minh Hai        | Minh Hai        | Bac Lieu           | Bac Lieu           |
|                 |                 |                 | Ca Mau             | Ca Mau             |
| <b>Dong Nai</b> | Dong Nai        | Dong Nai        | Dong Nai           | Dong Nai           |
|                 | Ba Ria-Vung Tau | Ba Ria-Vung Tau | Ba Ria-Vung<br>Tau | Ba Ria-Vung<br>Tau |

---

Table 8: Control for Red River and Mekong River

| VARIABLES                                | Population density<br>2009 (ln) | Share of urban<br>population 2009 (ln) | Per capita non-state<br>ind. prod. 2005 (ln) | Per capita income<br>2010 (ln) | Per capita cons.<br>exp. 1999 (ln) | Share of pop. living in<br>poverty 2010 (ln) |
|------------------------------------------|---------------------------------|----------------------------------------|----------------------------------------------|--------------------------------|------------------------------------|----------------------------------------------|
|                                          | (1)                             | (2)                                    | (3)                                          | (4)                            | (5)                                | (6)                                          |
| Share of Chinese population 1989 (ln)    | 0.756***<br>(0.226)             | 1.411*<br>(0.783)                      | 1.077<br>(0.814)                             | 0.212<br>(0.164)               | 0.116<br>(0.135)                   | -2.172***<br>(0.702)                         |
| Share of Chinese population 1979 (ln)    | -0.786***<br>(0.237)            | -1.318<br>(0.837)                      | -0.973<br>(0.862)                            | -0.187<br>(0.177)              | -0.130<br>(0.144)                  | 2.175***<br>(0.712)                          |
| Share of pop. in state sector 1989 (ln)  | 0.387***<br>(0.0914)            | 0.820***<br>(0.202)                    | 0.149<br>(0.265)                             | 0.317***<br>(0.0548)           | 0.172***<br>(0.0433)               | -0.872***<br>(0.211)                         |
| Population density 1976 (ln)             | 0.719***<br>(0.0381)            | 0.0557<br>(0.0979)                     | 0.150<br>(0.145)                             | 0.0462*<br>(0.0271)            | 0.0660***<br>(0.0204)              | -0.379***<br>(0.114)                         |
| Distance to Guangxi province, China (ln) | 0.208**<br>(0.102)              | -0.163<br>(0.237)                      | -0.146<br>(0.230)                            | -0.100**<br>(0.0414)           | -0.0607<br>(0.0555)                | -0.0927<br>(0.247)                           |
| Distance to closest major city           | -0.000357<br>(0.000246)         | 0.00140**<br>(0.000709)                | -0.000466<br>(0.000837)                      | -0.000267*<br>(0.000153)       | -0.000456***<br>(0.000150)         | 0.000780<br>(0.000658)                       |
| Southern provinces                       | 4.41e-05<br>(0.108)             | -0.325<br>(0.520)                      | -0.100<br>(0.291)                            | 0.0655<br>(0.0978)             | 0.200*<br>(0.111)                  | 0.644*<br>(0.380)                            |
| Coastal provinces                        | -0.0424<br>(0.0679)             | -0.0342<br>(0.148)                     | 0.0813<br>(0.181)                            | -0.0450<br>(0.0313)            | 0.00820<br>(0.0248)                | 0.249<br>(0.203)                             |
| Per capita govt's invest. 1976-85 (ln)   | 0.0202<br>(0.0134)              | 0.119***<br>(0.0425)                   | 0.134***<br>(0.0420)                         | 0.0458***<br>(0.00939)         | 0.0564***<br>(0.00758)             | -0.179***<br>(0.0455)                        |
| Average precipitation (ln)               | 0.0514<br>(0.228)               | -0.123<br>(0.687)                      | 1.118<br>(0.868)                             | 0.264*<br>(0.139)              | 0.293**<br>(0.141)                 | -0.582<br>(0.664)                            |
| Average temperature (ln)                 | 0.913<br>(0.994)                | 4.974<br>(3.489)                       | 7.516**<br>(3.814)                           | 3.189***<br>(0.687)            | 2.847***<br>(0.790)                | -10.05***<br>(2.930)                         |
| Mekong river provinces                   | -0.0929<br>(0.123)              | -0.186<br>(0.287)                      | -0.812**<br>(0.366)                          | -0.135**<br>(0.0649)           | -0.332***<br>(0.0460)              | 1.183***<br>(0.372)                          |
| Red river provinces                      | 0.185<br>(0.148)                | -0.182<br>(0.398)                      | 0.514<br>(0.428)                             | 0.108<br>(0.0887)              | -0.0580<br>(0.0693)                | 0.903**<br>(0.353)                           |
| Constant                                 | -2.952<br>(2.662)               | -12.91<br>(9.706)                      | -23.00**<br>(10.64)                          | -4.635**<br>(2.155)            | -3.229*<br>(1.962)                 | 40.77***<br>(7.846)                          |
| Observations                             | 37                              | 37                                     | 37                                           | 37                             | 37                                 | 37                                           |
| R-squared                                | 0.982                           | 0.580                                  | 0.741                                        | 0.930                          | 0.948                              | 0.789                                        |

Standard errors in parentheses

\*\*\* p&lt;0.01, \*\* p&lt;0.05, \* p&lt;0.1

Table 9: Control for Trade Effects

| VARIABLES                                | Population density<br>2009 (ln) | Share of urban<br>population 2009 (ln) | Per capita non-state<br>ind. prod. 2005 (ln) | Per capita income<br>2010 (ln) | Per capita cons.<br>exp. 1999 (ln) | Share of pop. living in<br>poverty 2010 (ln) |
|------------------------------------------|---------------------------------|----------------------------------------|----------------------------------------------|--------------------------------|------------------------------------|----------------------------------------------|
|                                          | (1)                             | (2)                                    | (3)                                          | (4)                            | (5)                                | (6)                                          |
| Share of Chinese population 1989 (ln)    | 0.704***<br>(0.213)             | 1.310*<br>(0.739)                      | 2.328**<br>(1.166)                           | 0.330*<br>(0.180)              | 0.274<br>(0.187)                   | -2.649**<br>(1.105)                          |
| Share of Chinese population 1979 (ln)    | -0.702***<br>(0.222)            | -1.192<br>(0.802)                      | -2.293*<br>(1.210)                           | -0.283<br>(0.187)              | -0.283<br>(0.195)                  | 2.662**<br>(1.126)                           |
| Share of pop. in state sector 1989 (ln)  | 0.366***<br>(0.0572)            | 0.742***<br>(0.205)                    | 0.447<br>(0.327)                             | 0.400***<br>(0.0568)           | 0.267***<br>(0.0478)               | -1.385***<br>(0.344)                         |
| Population density 1976 (ln)             | 0.769***<br>(0.0451)            | 0.00580<br>(0.148)                     | 0.00205<br>(0.275)                           | 0.0287<br>(0.0424)             | 0.0415<br>(0.0364)                 | -0.199<br>(0.215)                            |
| Distance to Guangxi province, China (ln) | 0.145**<br>(0.0684)             | -0.165<br>(0.271)                      | -0.493<br>(0.373)                            | -0.195***<br>(0.0517)          | -0.0884<br>(0.0723)                | -0.207<br>(0.372)                            |
| Distance to closest major city           | -0.000411**<br>(0.000203)       | 0.00113<br>(0.000696)                  | -0.000977<br>(0.00108)                       | -0.000121<br>(0.000172)        | -0.000490**<br>(0.000192)          | 0.000329<br>(0.00114)                        |
| Southern provinces                       | -0.0907<br>(0.117)              | -0.321<br>(0.471)                      | 0.270<br>(0.627)                             | 0.0274<br>(0.105)              | 0.146<br>(0.129)                   | 0.933<br>(0.662)                             |
| Coastal provinces                        | -0.107*<br>(0.0639)             | -0.148<br>(0.184)                      | -0.161<br>(0.334)                            | -0.0432<br>(0.0357)            | -0.0559<br>(0.0471)                | 0.260<br>(0.315)                             |
| Per capita govt's invest. 1976-85 (ln)   | 0.00253<br>(0.01000)            | 0.0939**<br>(0.0373)                   | 0.140***<br>(0.0494)                         | 0.0401***<br>(0.00944)         | 0.0360***<br>(0.0110)              | -0.115**<br>(0.0556)                         |
| Average precipitation (ln)               | 0.220<br>(0.208)                | -0.0459<br>(0.715)                     | 1.429<br>(1.289)                             | 0.211<br>(0.159)               | 0.351**<br>(0.158)                 | -0.223<br>(0.899)                            |
| Average temperature (ln)                 | -1.223<br>(1.150)               | 2.963<br>(4.685)                       | 7.117<br>(6.038)                             | 3.249***<br>(1.146)            | 0.967<br>(0.931)                   | -6.368<br>(5.419)                            |
| Provinces with class-I seaports          | 0.00640<br>(0.0671)             | 0.280<br>(0.194)                       | 0.553<br>(0.348)                             | -0.0317<br>(0.0555)            | 0.140*<br>(0.0794)                 | -0.318<br>(0.493)                            |
| Distance to Yunnan province, China (ln)  | 0.119<br>(0.0779)               | 0.0968<br>(0.335)                      | -0.217<br>(0.433)                            | -0.0373<br>(0.0611)            | 0.113<br>(0.0758)                  | -0.353<br>(0.420)                            |
| Share border with China                  | -0.303***<br>(0.0878)           | -0.207<br>(0.385)                      | -0.610<br>(0.554)                            | -0.278***<br>(0.0589)          | -0.182**<br>(0.0743)               | 0.0446<br>(0.386)                            |
| Constant                                 | 2.701<br>(2.695)                | -6.999<br>(10.70)                      | -18.96<br>(13.63)                            | -3.603<br>(2.740)              | 2.035<br>(2.199)                   | 30.21**<br>(12.51)                           |
| Observations                             | 37                              | 37                                     | 37                                           | 37                             | 37                                 | 37                                           |
| R-squared                                | 0.988                           | 0.642                                  | 0.447                                        | 0.930                          | 0.903                              | 0.594                                        |

Standard errors in parentheses

\*\*\* p&lt;0.01, \*\* p&lt;0.05, \* p&lt;0.1



Table 10: The Impacts of Ethnic Chinese Minority on Change in Population Density, Urbanization, Per Capita Non-state Industrial Production, and Per Capita Income

| VARIABLES                                      | Change in population density<br>1989-2009 ( $\Delta \ln$ ) | Change in share of urban<br>population 1989-2009 ( $\Delta \ln$ ) | Change in per capita non-state<br>ind. prod. 1990-2005 ( $\Delta \ln$ ) | Change in per capita income<br>1996-2010 ( $\Delta \ln$ ) |
|------------------------------------------------|------------------------------------------------------------|-------------------------------------------------------------------|-------------------------------------------------------------------------|-----------------------------------------------------------|
|                                                | (1)                                                        | (2)                                                               | (3)                                                                     | (4)                                                       |
| Share of Chinese population 1989 ( $\ln$ )     | 0.684***<br>(0.200)                                        | 1.145**<br>(0.492)                                                | 1.780<br>(1.083)                                                        | 0.332*<br>(0.197)                                         |
| Share of Chinese population 1979 ( $\ln$ )     | -0.685***<br>(0.207)                                       | -1.089**<br>(0.517)                                               | -1.736<br>(1.122)                                                       | -0.285<br>(0.198)                                         |
| Share of pop. in state sector 1989 ( $\ln$ )   | 0.381***<br>(0.0565)                                       | 0.407***<br>(0.157)                                               | 0.335<br>(0.297)                                                        | 0.406***<br>(0.0869)                                      |
| Population density 1976 ( $\ln$ )              | -0.123***<br>(0.0404)                                      | -0.0983<br>(0.104)                                                | -0.0729<br>(0.264)                                                      | 0.0300<br>(0.0366)                                        |
| Distance to Guangxi province, China ( $\ln$ )  | 0.107**<br>(0.0531)                                        | -0.296<br>(0.186)                                                 | -0.496<br>(0.322)                                                       | -0.193***<br>(0.0509)                                     |
| Distance to closest major city                 | 2.60e-05<br>(0.000204)                                     | 0.000395<br>(0.000516)                                            | -0.00100<br>(0.000867)                                                  | -0.000125<br>(0.000180)                                   |
| Southern provinces                             | -0.271***<br>(0.0915)                                      | -0.196<br>(0.361)                                                 | 0.326<br>(0.537)                                                        | 0.0237<br>(0.124)                                         |
| Coastal provinces                              | -0.0915<br>(0.0568)                                        | -0.225<br>(0.149)                                                 | -0.243<br>(0.292)                                                       | -0.0438<br>(0.0360)                                       |
| Per capita govt's invest. 1976-85 ( $\ln$ )    | 0.0107<br>(0.00773)                                        | 0.0610**<br>(0.0300)                                              | 0.116**<br>(0.0468)                                                     | 0.0407***<br>(0.0137)                                     |
| Average precipitation ( $\ln$ )                | 0.0655<br>(0.161)                                          | 0.223<br>(0.512)                                                  | 1.166<br>(1.011)                                                        | 0.215<br>(0.168)                                          |
| Average temperature ( $\ln$ )                  | 0.416<br>(0.786)                                           | 3.645<br>(2.444)                                                  | 5.390<br>(4.912)                                                        | 3.259***<br>(1.198)                                       |
| Provinces with type-1 ports                    | 0.0109<br>(0.0784)                                         | 0.259*<br>(0.147)                                                 | 0.488*<br>(0.284)                                                       | -0.0330<br>(0.0539)                                       |
| Distance to Yunnan province, China ( $\ln$ )   | 0.0990*<br>(0.0599)                                        | 0.0308<br>(0.230)                                                 | -0.348<br>(0.364)                                                       | -0.0354<br>(0.0609)                                       |
| Share border with China                        | -0.161**<br>(0.0750)                                       | -0.352<br>(0.261)                                                 | -0.590<br>(0.479)                                                       | -0.280***<br>(0.0659)                                     |
| Share of urban population 1989 ( $\ln$ )       |                                                            | -0.555***<br>(0.111)                                              |                                                                         |                                                           |
| Per capita non-state ind. prod. 1990 ( $\ln$ ) |                                                            |                                                                   | -0.634**<br>(0.268)                                                     |                                                           |
| Per capita income 1996 ( $\ln$ )               |                                                            |                                                                   |                                                                         | -1.015***<br>(0.126)                                      |
| Constant                                       | -2.336<br>(2.002)                                          | -9.011<br>(5.723)                                                 | -12.06<br>(12.14)                                                       | -3.609<br>(2.770)                                         |
| Observations                                   | 37                                                         | 37                                                                | 37                                                                      | 37                                                        |
| R-squared                                      | 0.786                                                      | 0.511                                                             | 0.435                                                                   | 0.819                                                     |

Standard errors in parentheses

\*\*\* p&lt;0.01, \*\* p&lt;0.05, \* p&lt;0.1

Table 11: Takes logs of distance to closest major city

|                                          | Population density<br>2009 (ln) | Share of urban<br>population 2009 (ln) | Per capita non-state<br>ind. prod. 2005 (ln) | Per capita income<br>2010 (ln) | Per capita cons. exp.<br>1999 (ln) | Share of pop. living<br>in poverty 2010 (ln) |
|------------------------------------------|---------------------------------|----------------------------------------|----------------------------------------------|--------------------------------|------------------------------------|----------------------------------------------|
| VARIABLES                                | (1)                             | (2)                                    | (3)                                          | (4)                            | (5)                                | (6)                                          |
| Share of Chinese population 1989 (ln)    | 1.060***<br>(0.286)             | 0.781<br>(0.724)                       | 2.096*<br>(1.087)                            | 0.489**<br>(0.220)             | 0.413*<br>(0.241)                  | -1.850**<br>(0.877)                          |
| Share of Chinese population 1979 (ln)    | -1.121***<br>(0.307)            | -0.654<br>(0.764)                      | -2.090*<br>(1.137)                           | -0.485**<br>(0.233)            | -0.457*<br>(0.255)                 | 1.911**<br>(0.904)                           |
| Share of pop. in state sector 1989 (ln)  | 0.430***<br>(0.114)             | 0.851***<br>(0.194)                    | 0.656<br>(0.447)                             | 0.418***<br>(0.0805)           | 0.325***<br>(0.0767)               | -0.920***<br>(0.292)                         |
| Population density 1976 (ln)             | 0.687***<br>(0.0901)            | 0.207*<br>(0.124)                      | 0.185<br>(0.277)                             | 0.0336<br>(0.0479)             | -0.0226<br>(0.0560)                | 0.0957<br>(0.171)                            |
| Distance to Guangxi province, China (ln) | 0.147<br>(0.136)                | -0.0459<br>(0.193)                     | -0.184<br>(0.404)                            | -0.119<br>(0.0764)             | -0.111<br>(0.118)                  | 0.185<br>(0.250)                             |
| Distance to closest major city (ln)      | -0.130<br>(0.0805)              | 0.350***<br>(0.0919)                   | -0.221<br>(0.298)                            | -0.0811*<br>(0.0448)           | -0.114**<br>(0.0455)               | 0.258<br>(0.176)                             |
| Southern provinces                       | 0.0114<br>(0.126)               | -0.0585<br>(0.318)                     | 0.0749<br>(0.500)                            | 0.0584<br>(0.123)              | 0.211<br>(0.153)                   | 0.248<br>(0.434)                             |
| Coastal provinces                        | -0.0260<br>(0.0893)             | -0.0741<br>(0.130)                     | 0.146<br>(0.275)                             | -0.0273<br>(0.0517)            | 0.0747<br>(0.0528)                 | -0.0629<br>(0.190)                           |
| Per capita govt's invest. 1976-85 (ln)   | 0.0278**<br>(0.0119)            | 0.0937***<br>(0.0282)                  | 0.135***<br>(0.0485)                         | 0.0489***<br>(0.00912)         | 0.0530***<br>(0.0126)              | -0.134***<br>(0.0371)                        |
| Average precipitation (ln)               | 0.146<br>(0.244)                | 0.100<br>(0.387)                       | 1.536<br>(1.004)                             | 0.300*<br>(0.167)              | 0.246<br>(0.179)                   | -0.477<br>(0.609)                            |
| Average temperature (ln)                 | 1.003<br>(1.313)                | 1.948<br>(2.488)                       | 4.792<br>(4.800)                             | 3.086***<br>(1.009)            | 2.903**<br>(1.225)                 | -9.410***<br>(3.203)                         |
| Constant                                 | -2.592<br>(3.160)               | -7.706<br>(7.523)                      | -16.07<br>(13.84)                            | -4.063<br>(2.837)              | -2.189<br>(3.187)                  | 33.63***<br>(9.140)                          |
| Observations                             | 36                              | 36                                     | 36                                           | 36                             | 36                                 | 36                                           |
| R-squared                                | 0.962                           | 0.653                                  | 0.389                                        | 0.837                          | 0.754                              | 0.547                                        |

Standard errors in parentheses

\*\*\* p&lt;0.01, \*\* p&lt;0.05, \* p&lt;0.1
